# Supplementary material for: Evolutionary Dynamics of Whole-Genome Influenza A/H3N2 Viruses Isolated in Myanmar from 2015 to 2019
Source: MDPI journal article supplement (doi:10.3390/v14112414), 2022-10-31
Supplement: s1 [file s1]

**Supplementary Table S1. List of mutation differences in the HA gene between Myanmar 2015–2019 viruses and the A/Texas/50/2012 vaccine strain.**

| <b>Year</b> | <b>Clade</b> | <b>Amino acid mutations found in each position</b>                                    |
|-------------|--------------|---------------------------------------------------------------------------------------|
| 2015        | 3C.2a        | L3I, N144S, N145S, F159Y, K160T, N225D, Q311H, S144I, K450R                           |
| 2016        | 3C.2a        | L3I, N144S, N145S, F159Y, K160T, N225D, Q311H, S144I, K450R                           |
|             | 3C.2a1       | L3I, N128T, N144S, N145S, F159Y, K160T, N225D, Q311H, N171K                           |
| 2017        | 3C.2a1b      | L3I, N128T, N144S, N145S, F159Y, K160T, N225D, E62G, K92R, N121K, T135K, R142G, N171K |
| 2018        | 3C.2a        | L3I, N144S, N145S, F159Y, K160T, N225D, Q311H, S144I, K450R, Q311H                    |
|             | 3C.2a1b      | L3I, N144S, N145S, F159Y, K160T, N225D, E62G, K92R, N121K, T135K, R142G, N171K        |
| 2019        | 3C.2a1b      | L3I, N144S, N145S, F159Y, K160T, N225D, E62G, K92R, N121K, T135K, R142G, N171K        |

**Supplementary Table S2. List of mutation differences in the NA gene between Myanmar 2015–2019 viruses and the vaccine strains in respective seasons.**

| Representative strain           | Clade                   | Amino acid mutations in each nucleotide position* |     |     |     |     |     |     |     |     |     |     |     |     |  |
|---------------------------------|-------------------------|---------------------------------------------------|-----|-----|-----|-----|-----|-----|-----|-----|-----|-----|-----|-----|--|
| 2015                            |                         | 245                                               | 247 | 267 | 380 | 392 |     |     |     |     |     |     |     |     |  |
| A/Switzerland/9715293/2013      | 3C.3a                   | S                                                 | S   | T   | I   | T   |     |     |     |     |     |     |     |     |  |
| 2015 Myanmar viruses            | 3C.2a                   | N                                                 | T   | K   | V   | I   |     |     |     |     |     |     |     |     |  |
|                                 |                         |                                                   |     |     |     |     |     |     |     |     |     |     |     |     |  |
| 2016                            |                         | 140                                               | 231 | 245 | 247 | 267 | 339 | 380 | 392 | 468 |     |     |     |     |  |
| A/Hong Kong/4801/2014           | 3C.2a                   | L                                                 | I   | S   | S   | T   | D   | I   | T   | P   |     |     |     |     |  |
| 2016 Myanmar viruses            | 3C.2a<br>and<br>3C.2a1  | I                                                 | V   | N   | T   | K   | N   | V   | I   | H   |     |     |     |     |  |
|                                 |                         |                                                   |     |     |     |     |     |     |     |     |     |     |     |     |  |
| 2017                            |                         | 75                                                | 126 | 220 | 231 | 245 | 247 | 267 | 303 | 329 | 339 | 380 | 392 | 468 |  |
| A/Hong Kong/4801/2014           | 3C.2a                   | K                                                 | P   | K   | I   | S   | S   | T   | V   | N   | D   | I   | T   | P   |  |
| 2017 Myanmar viruses            | 3C.2a1b                 | R                                                 | L   | N   | V   | N   | T   | K   | I   | S   | N   | V   | I   | H   |  |
|                                 |                         |                                                   |     |     |     |     |     |     |     |     |     |     |     |     |  |
| 2018                            |                         | 126                                               | 212 | 220 | 303 | 329 |     |     |     |     |     |     |     |     |  |
| A/Singapore/INFIMH-16-0019/2016 | 3C.2a1                  | P                                                 | I   | K   | V   | N   |     |     |     |     |     |     |     |     |  |
| 2018 Myanmar viruses            | 3C.2a<br>and<br>3C.2a1b | L                                                 | V   | N   | I   | S   |     |     |     |     |     |     |     |     |  |
|                                 |                         |                                                   |     |     |     |     |     |     |     |     |     |     |     |     |  |
| 2019                            |                         | 126                                               | 176 | 194 | 220 | 303 | 344 | 386 | 469 |     |     |     |     |     |  |
| A/Switzerland/8060/2017         | 3C.2a2                  | P                                                 | M   | V   | K   | V   | E   | S   | I   |     |     |     |     |     |  |
| 2019 Myanmar viruses            | 3C.2a1b                 | L                                                 | I   | I   | N   | I   | K   | P   | T   |     |     |     |     |     |  |

\*Amino acid mutations are compared to the vaccine strains in each season from 2015 to 2019.

**Supplementary Table S3. List of mutation differences in the PB2 gene between Myanmar 2015–2019 viruses and the vaccine strains in respective seasons.**

| Representative strain           | Clade             | Amino acid mutations in each nucleotide position* |     |     |     |     |     |     |
|---------------------------------|-------------------|---------------------------------------------------|-----|-----|-----|-----|-----|-----|
| 2015                            |                   | 63                                                | 299 | 354 | 588 |     |     |     |
| A/Switzerland/9715293/2013      | 3C.3a             | V                                                 | R   | I   | I   |     |     |     |
| 2015 Myanmar viruses            | 3C.2a             | I                                                 | K   | V   | T   |     |     |     |
|                                 |                   |                                                   |     |     |     |     |     |     |
| 2016                            |                   | 63                                                | 299 | 470 | 588 |     |     |     |
| A/Hong Kong/4801/2014           | 3C.2a             | V                                                 | R   | S   | I   |     |     |     |
| 2016 Myanmar viruses            | 3C.2a and 3C.2a1  | I                                                 | K   | N   | T   |     |     |     |
|                                 |                   |                                                   |     |     |     |     |     |     |
| 2017                            |                   | 63                                                | 107 | 340 | 588 | 684 |     |     |
| A/Hong Kong/4801/2014           | 3C.2a             | V                                                 | S   | K   | I   | S   |     |     |
| 2017 Myanmar viruses            | 3C.2a1b           | I                                                 | N   | R   | T   | P   |     |     |
|                                 |                   |                                                   |     |     |     |     |     |     |
| 2018                            |                   | 96                                                | 107 | 299 | 451 | 340 | 588 | 545 |
| A/Singapore/INFIMH-16-0019/2016 | 3C.2a1            | I                                                 | S   | K   | V   | K   | I   | V   |
| 2018 Myanmar viruses            | 3C.2a and 3C.2a1b | V                                                 | N   | R   | I   | R   | T   | I   |
|                                 |                   |                                                   |     |     |     |     |     |     |
| 2019                            |                   | 107                                               | 147 | 299 | 340 | 410 | 444 |     |
| A/Switzerland/8060/2017         | 3C.2a2            | S                                                 | T   | K   | K   | M   | V   |     |
| 2019 Myanmar viruses            | 3C.2a1b           | N                                                 | I   | R   | R   | V   | I   |     |

\*Amino acid mutations are compared to the vaccine strains in each season from 2015 to 2019.

**Supplementary Table S4. List of mutation differences in the PB1 gene between Myanmar 2015–2019 viruses and the vaccine strains in respective seasons.**

| Representative strain           | Clade             | Amino acid mutations in each nucleotide position* |     |     |     |
|---------------------------------|-------------------|---------------------------------------------------|-----|-----|-----|
| 2015                            |                   | 155                                               | 753 | 507 |     |
| A/Switzerland/9715293/2013      | 3C.3a             | L                                                 | L   | M   |     |
| 2015 Myanmar viruses            | 3C.2a             | F                                                 | I   | T   |     |
|                                 |                   |                                                   |     |     |     |
| 2016                            |                   | 152                                               | 166 | 216 | 668 |
| A/Hong Kong/4801/2014           | 3C.2a             | T                                                 | Y   | G   | P   |
| 2016 Myanmar viruses            | 3C.2a and 3C.2a1  | S                                                 | F   | C   | L   |
|                                 |                   |                                                   |     |     |     |
| 2017                            |                   | 152                                               | 166 |     |     |
| A/Hong Kong/4801/2014           | 3C.2a             | T                                                 | Y   |     |     |
| 2017 Myanmar viruses            | 3C.2a1b           | S                                                 | F   |     |     |
|                                 |                   |                                                   |     |     |     |
| 2018                            |                   | 56                                                | 200 | 574 | 667 |
| A/Singapore/INFIMH-16-0019/2016 | 3C.2a1            | T                                                 | V   | S   | I   |
| 2018 Myanmar viruses            | 3C.2a and 3C.2a1b | A                                                 | I   | L   | N   |
|                                 |                   |                                                   |     |     |     |
| 2019                            |                   | 52                                                | 383 |     |     |
| A/Switzerland/8060/2017         | 3C.2a2            | R                                                 | E   |     |     |
| 2019 Myanmar viruses            | 3C.2a1b           | K                                                 | D   |     |     |

\*Amino acid mutations are compared to the vaccine strains in each season from 2015 to 2019.

**Supplementary Table S5. List of mutation differences in the PA gene between Myanmar 2015–2019 viruses and the vaccine strains in respective seasons.**

| Representative strain           | Clade                   | Amino acid mutations in each nucleotide position* |     |     |     |     |     |     |     |     |     |     |
|---------------------------------|-------------------------|---------------------------------------------------|-----|-----|-----|-----|-----|-----|-----|-----|-----|-----|
| 2015                            |                         | 256                                               | 272 | 308 | 407 | 534 | 554 | 605 | 668 | 669 | 675 | 713 |
| A/Switzerland/9715293/2013      | 3C.3a                   | K                                                 | N   | V   | M   | P   | V   | R   | V   | I   | N   | Y   |
| 2015 Myanmar viruses            | 3C.2a                   | Q                                                 | S   | I   | I   | T   | I   | K   | I   | V   | K   | H   |
|                                 |                         |                                                   |     |     |     |     |     |     |     |     |     |     |
| 2016                            |                         | 272                                               | 284 | 357 | 611 | 639 |     |     |     |     |     |     |
| A/Hong Kong/4801/2014           | 3C.2a                   | N                                                 | L   | T   | F   | T   |     |     |     |     |     |     |
| 2016 Myanmar viruses            | 3C.2a<br>and<br>3C.2a1  | S                                                 | M   | A   | L   | I   |     |     |     |     |     |     |
|                                 |                         |                                                   |     |     |     |     |     |     |     |     |     |     |
| 2017                            |                         | 158                                               | 251 | 727 |     |     |     |     |     |     |     |     |
| A/Hong Kong/4801/2014           | 3C.2a                   | K                                                 | R   | V   |     |     |     |     |     |     |     |     |
| 2017 Myanmar viruses            | 3C.2a1b                 | R                                                 | K   | I   |     |     |     |     |     |     |     |     |
|                                 |                         |                                                   |     |     |     |     |     |     |     |     |     |     |
| 2018                            |                         | 105                                               | 158 | 551 | 668 |     |     |     |     |     |     |     |
| A/Singapore/INFIMH-16-0019/2016 | 3C.2a1                  | L                                                 | K   | R   | V   |     |     |     |     |     |     |     |
| 2018 Myanmar viruses            | 3C.2a<br>and<br>3C.2a1b | F                                                 | R   | K   | I   |     |     |     |     |     |     |     |
|                                 |                         |                                                   |     |     |     |     |     |     |     |     |     |     |
| 2019                            |                         | 158                                               | 626 | 648 |     |     |     |     |     |     |     |     |
| A/Switzerland/8060/2017         | 3C.2a2                  | K                                                 | K   | S   |     |     |     |     |     |     |     |     |
| 2019 Myanmar viruses            | 3C.2a1b                 | R                                                 | R   | N   |     |     |     |     |     |     |     |     |

\*Amino acid mutations are compared to the vaccine strains in each season from 2015 to 2019.

**Supplementary Table S6. List of mutation differences in the NP gene between Myanmar 2015–2019 viruses and the vaccine strains in respective seasons.**

| Representative strain           | Clade             | Amino acid mutations in each nucleotide position* |     |     |     |
|---------------------------------|-------------------|---------------------------------------------------|-----|-----|-----|
|                                 |                   | 217                                               |     |     |     |
| A/Switzerland/9715293/2013      | 3C.3a             | G                                                 |     |     |     |
| 2015 Myanmar viruses            | 3C.2a             | S                                                 |     |     |     |
|                                 |                   |                                                   |     |     |     |
|                                 |                   | 101                                               | 417 | 454 | 472 |
| A/Hong Kong/4801/2014           | 3C.2a             | G                                                 | N   | D   | T   |
| 2016 Myanmar viruses            | 3C.2a and 3C.2a1  | D                                                 | S   | E   | A   |
|                                 |                   |                                                   |     |     |     |
|                                 |                   | 101                                               | 197 | 454 | 472 |
| A/Hong Kong/4801/2014           | 3C.2a             | G                                                 | V   | D   | T   |
| 2017 Myanmar viruses            | 3C.2a1b           | D                                                 | I   | E   | A   |
|                                 |                   |                                                   |     |     |     |
|                                 |                   | 197                                               | 421 | 450 | 472 |
| A/Singapore/INFIMH-16-0019/2016 | 3C.2a1            | V                                                 | E   | G   | A   |
| 2018 Myanmar viruses            | 3C.2a and 3C.2a1b | I                                                 | D   | S   | T   |
|                                 |                   |                                                   |     |     |     |
|                                 |                   | 220                                               | 363 | 418 |     |
| A/Switzerland/8060/2017         | 3C.2a2            | E                                                 | V   | L   |     |
| 2019 Myanmar viruses            | 3C.2a1b           | D                                                 | I   | I   |     |

\*Amino acid mutations are compared to the vaccine strains in each season from 2015 to 2019.
